# Supplementary material
Source: PubMed Central journal article supplement (PMC4690765)
Supplement: NIHMS733239-supplement-Supplemental_Figures.pdf [file NIHMS733239-supplement-Supplemental_Figures.pdf]

## SUPPLEMENTAL FIGURES

**A**

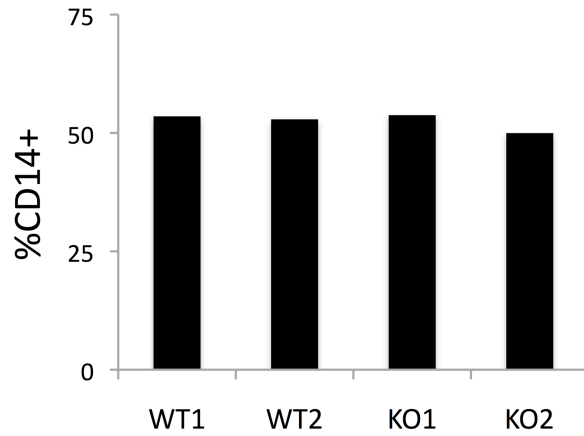

**B**

|     | %CD14+ |
|-----|--------|
| WT1 | 53.51  |
| WT2 | 52.88  |
| KO1 | 53.76  |
| KO2 | 49.97  |

**C**

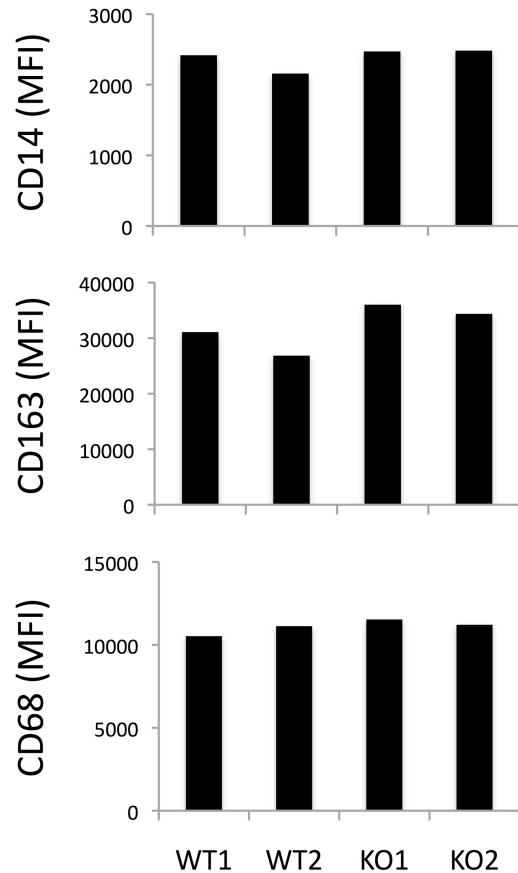

**Supplemental Figure I.** Differentiation efficiency is not affected by loss of ABCA1 expression in stem cell-derived macrophages. **A, B**, Cells harvested from the supernatants of the differentiation cultures were analysed for the percentage of CD14+ cells (WT1, WT2 = wild-type, KO1, KO2 = *ABCA1*<sup>-/-</sup>). **C**, There were no overt differences in differentiation efficiency between wild-type and *ABCA1*<sup>-/-</sup> stem cell-derived macrophages, as assessed by typical macrophage markers CD14, CD68, and CD163 expression (MFI = mean fluorescence intensity). One representative experiment out of three independent experiments is shown.

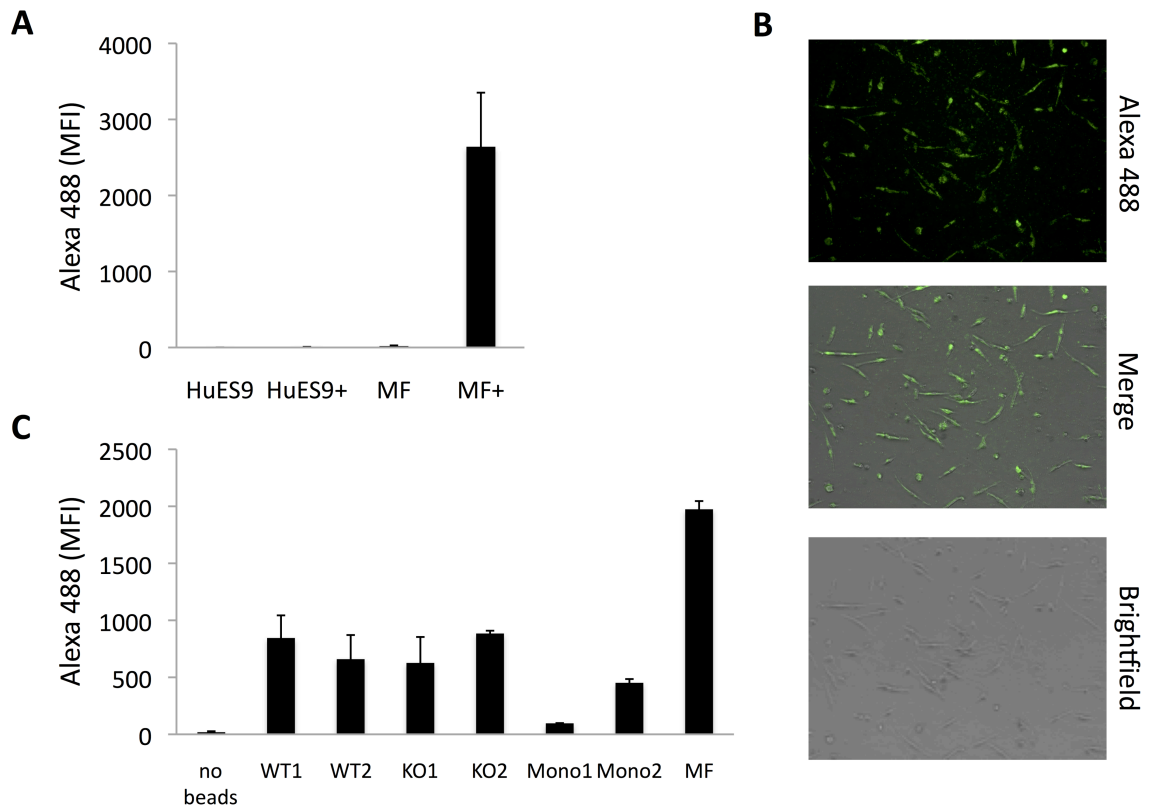

**Supplemental Figure II.** Phagocytic ability is intact in wild-type and *ABCA1*<sup>-/-</sup> stem cell-derived macrophages. **A**, Comparison of the parental HUES 9 cell line (HuES9) and HUES 9-derived CD14<sup>+</sup> macrophages (MF) in the absence or presence (+) of *Escherichia coli* (K-12 strain) BioParticles, Alexa Fluor 488 conjugates. Cells were seeded 24 hours prior to the experiment and subsequently exposed for 3 hours to conjugates at a ratio of 1:100. **B**, Immunofluorescence indicating uptake of the conjugates. **C**, HUES 9-derived macrophages derived from either wild-type (WT1, WT2) or *ABCA1*<sup>-/-</sup> (KO1, KO2) stem cells were compared to CD14<sup>+</sup> monocytes isolated from two different donors (Mono1, Mono2), and to PBMC-derived macrophages (MF) that have been matured for 5 days in the presence of 100 ng/mL M-CSF. Error bars represent standard deviations for sets of three replicates (*N* = 3).
